# Supplementary material for: Symmetric inheritance of parental histones governs epigenome maintenance and embryonic stem cell identity
Source: PubMed Central journal article supplement (PMC10484787; doi:10.1038/s41588-023-01476-x), 2023-09-04

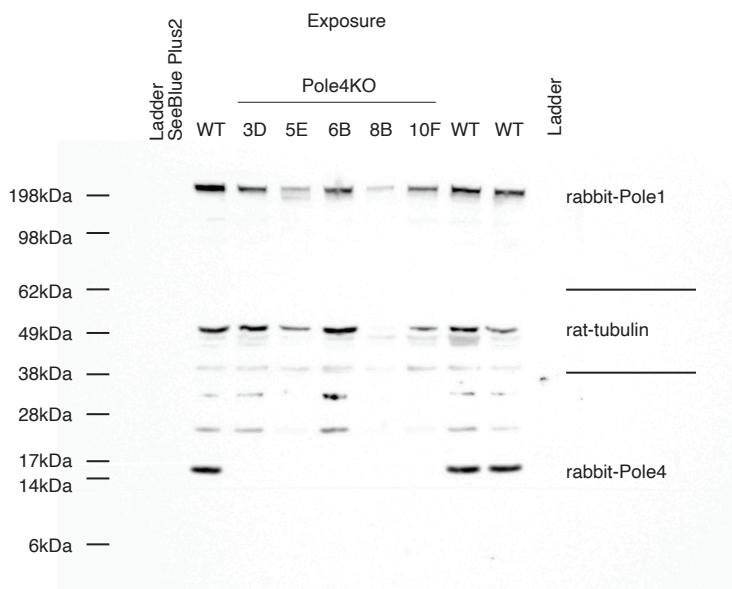

cell line #550: POLE4-KO#3  
 cell line #551: POLE4-KO#1  
 cell line #552: POLE4-KO#2  
 cell line #553: clone 3D  
 cell line #554: remaining clones

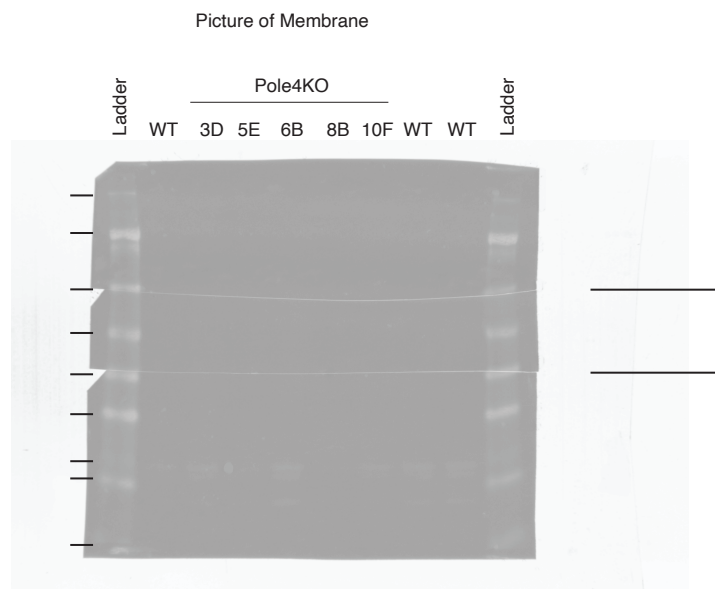

Supplement: 41588_2023_1476_MOESM10_ESM.pdf [file 41588_2023_1476_MOESM10_ESM.pdf]
